# Supplementary material
Source: Atypon-hosted journal article supplement (doi:10.57264/cer-2025-0194)
Supplement: supplementary data.docx [file supplementary%20data.docx]

**Supplementary Materials**

**Supplementary Table 1. IRB Approval Numbers for Each Institution Participating in the Health-Related Quality of Life Survey for Cervical Cancer Patients.**

| Hospital | Patients | IRB Number |
| --- | --- | --- |
| Seoul National University Hospital | 25 | 2307-198-1454 |
| Inje University Busan Paik Hospital | 26 | 2023-07-018 |
| CHA Bundang Medical Center | 18 | 2023-08-014 |
| Korea University Ansan Hospital | 23 | 2023AS0208 |
| Konkuk University Medical Center | 26 | KUMC 2023-09-038-001 |
| Severance Hospital | 20 | 4-2023-0719 |
| The Catholic University of Korea Seoul St. Mary’s Hospital | 24 | KC23QNDI0625 |
| Ajou University Hospital | 26 | AJOUIRB-SB-2023-433 |
| Hanllym University Kangnam Sacred Heart Hospital | 3 | HKS 2023-08-017 |
| Kyung Hee University Medical Center | 23 | 2023-08-002-006 |
| Korea University Guro Hospital | 24 | 2023GR0339 |
| Hanyang University Seoul Hospital | 12 | 2023-08-009-012 |
